# Supplementary material for: Multiparametric radiobiological assays show that variation of X-ray energy strongly impacts relative biological effectiveness: comparison between 220 kV and 4 MV
Source: PubMed Central journal article supplement (PMC6778087; doi:10.1038/s41598-019-50908-4), 2019-10-04
Supplement: 41598_2019_50908_MOESM1_ESM.pdf [file 41598_2019_50908_MOESM1_ESM.pdf]

**Multiparametric radiobiological assays show that variation of X-ray energy strongly impacts relative biological effectiveness: comparison between 220 kV and 4 MV**

Vincent Paget, Mariam Ben Kacem, Morgane Dos Santos, Mohamed A. Benadjaoud, Frédéric Soysouvanh, Valérie Buard, Georges Tarlet, Aurélie Vaurijoux, Gaëtan Gruel, Agnès François, Olivier Guipaud and Fabien Milliat

**Supplementary Table S1**

| SF   | RBE (220 kV vs 4MV) | 95% CI*                    |
|------|---------------------|----------------------------|
| 0.01 | 1.01                | [0.97;1.06] <sup>1</sup> # |
| 0.02 | 1.03                | [0.98;1.08] #              |
| 0.05 | 1.08                | [1.02;1.14]                |
| 0.10 | 1.11                | [1.06;1.17]                |
| 0.15 | 1.13                | [1.07;1.20]                |
| 0.20 | 1.15                | [1.08;1.22]                |
| 0.25 | 1.16                | [1.08;1.25]                |
| 0.30 | 1.18                | [1.09;1.28]                |
| 0.35 | 1.19                | [1.09;1.31]                |
| 0.40 | 1.21                | [1.09;1.34]                |
| 0.45 | 1.22                | [1.09;1.37]                |
| 0.50 | 1.23                | [1.09;1.40]                |
| 0.55 | 1.25                | [1.09;1.43]                |
| 0.60 | 1.26                | [1.09;1.46]                |
| 0.65 | 1.27                | [1.09;1.49]                |
| 0.70 | 1.29                | [1.09;1.52]                |
| 0.75 | 1.30                | [1.10;1.55]                |
| 0.80 | 1.31                | [1.10;1.58]                |
| 0.85 | 1.33                | [1.10;1.62]                |
| 0.90 | 1.34                | [1.10;1.66]                |
| 0.95 | 1.36                | [1.10;1.69]                |

**Supplementary Table S1: Clonogenic assay RBE values** (Ratio of doses for a given SF). \* 95% CI = 95% confidence interval. # Not significant (CI including 1).
